# Supplementary material for: Functional Advantages of Porphyromonas gingivalis Vesicles
Source: PubMed Central journal article supplement (PMC4405273; doi:10.1371/journal.pone.0123448), 2015-04-21
Supplement: pone.0123448.s001.pdf [file pone.0123448.s001.pdf]

**S1 Table. Oligonucleotide primers used in this study**

| <b>Gene</b>                                             | <b>Primer name</b> | <b>Primer sequences (5'-3')</b> |
|---------------------------------------------------------|--------------------|---------------------------------|
| <i>thioredoxin (trx)</i>                                | Pg0275-81F         | ttggcagggattttcgggtgcaga        |
|                                                         | Pg0275-81R         | gcccacggttgcgtcggatttc          |
| <i>superoxide dismutase (sod)</i>                       | Pg1545-235F        | aattccaccacggtaagcac            |
|                                                         | Pg1545-235R        | gagccgaattgtttgctgat            |
| <i>glucose kinase (glk)</i>                             | pg1737-131F        | atgaatccgatccgccaccac           |
|                                                         | Pg1737-131R        | gcctcccatcccaaagcact            |
| <i>redox-sensitive transcriptional activator (oxyR)</i> | pg0270-132F        | tcgcaagccaagcaaatac             |
|                                                         | pg0270-132R        | gacacgaggcaggagatagg            |
| <i>hmuY</i>                                             | Pg1551-149F        | gcaccacgagcttctttac             |
|                                                         | Pg1551-149R        | atacgggaattgccatgaag            |
| <i>phosphoserine phosphatase (psph)</i>                 | Pg0653-F           | agcgatcttgaagcctacca            |
|                                                         | Pg0653-R           | tctgtgatgcaggagattgc            |
| <i>arginine-specific cysteine proteinase (rgpA)</i>     | Pgn1970-160F       | gtcaccgtctgcatcgcgcg            |
|                                                         | Pgn1970-160R       | agtcggccagaaagtaacgc            |
| <i>DNA-binding response regulator (rprY)</i>            | Pgn1186-120F       | gctcgtttctttggctgctc            |
|                                                         | Pgn1186-120R       | gcgagcgttcgaacaagtat            |
| <i>TonB-dependent receptor (tbdR)</i>                   | Pg0707-147F        | gcctgtacggttcttctgc             |
|                                                         | Pg0707-147R        | gacgatggaggcattgaagt            |
| <i>Pgn 1301</i>                                         | Pgn1301-F1         | ccacacggatgataccctct            |
|                                                         | Pgn1301-R1         | gtactacgcgcagggaagaa            |
| <i>hydrolase</i>                                        | Pg1170-F           | ttcgcaacaatcaagagc              |
|                                                         | Pg-1170-R          | ccgatagacgacctgtcagca           |
| <i>nucleotide pyrophosphatase (npp)</i>                 | Pgn0239F-127       | tatgggcagagagtccaacc            |
|                                                         | Pgn0239R-127       | gtacatcgaggagccggata            |
| <i>fimR</i>                                             | fimR-124F          | taaccacgggtagccatttc            |
|                                                         | fimR-124R          | gagtcgttctgctgctgttg            |
| <i>mfa1</i>                                             | mfa1 RT-F          | cagatgggtgtgtgctca              |
|                                                         | mfa1 RT-R          | atggaaagtgctgctggtag            |
| <i>fimA</i>                                             | fimA1-392F         | ctgtgtgttatggcaaactc            |
|                                                         | fimA1-392R         | aaccccgtccctgtattccga           |

*fimA full length (fimA-FL)*

FimA F 1200

ttgtgggacttgctgctc

FimA R 1200

aaccccgctccctgtattc

*16s rRNA*

16s-rRNA F

tgggtttaagggtgcgtag

16s-rRNA R

caatcggagttcctcgtgat

---
